CORRECTION

# Correction: A refined model of claudin-15 tight junction paracellular architecture by molecular dynamics simulations

Giulio Alberini, Fabio Benfenati, Luca Maragliano

The following information is missing from the Funding section: This project has received funding from the European Union's Horizon 2020 research and innovation programme under grant agreement No. 696656 –GrapheneCore1.

## Reference

1. Alberini G, Benfenati F, Maragliano L (2017) A refined model of claudin-15 tight junction paracellular architecture by molecular dynamics simulations. PLoS ONE 12(9): e0184190. <https://doi.org/10.1371/journal.pone.0184190> PMID: 28863193

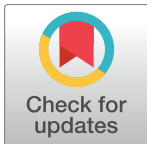

## OPEN ACCESS

**Citation:** Alberini G, Benfenati F, Maragliano L (2018) Correction: A refined model of claudin-15 tight junction paracellular architecture by molecular dynamics simulations. PLoS ONE 13(2): e0193383. <https://doi.org/10.1371/journal.pone.0193383>

**Published:** February 20, 2018

**Copyright:** © 2018 Alberini et al. This is an open access article distributed under the terms of the [Creative Commons Attribution License](https://creativecommons.org/licenses/by/4.0/), which permits unrestricted use, distribution, and reproduction in any medium, provided the original author and source are credited.
